# Supplementary material for: Vegetation Affects the Responses of Canopy Spider Communities to Elevation Gradients on Changbai Mountain, China
Source: MDPI journal article supplement (doi:10.3390/insects15030154), 2024-02-24
Supplement: s1 [file s1]

# Vegetation affects the responses of canopy spider communities to elevation gradients on Changbai Mountain, China

Pengfeng Wu <sup>1</sup>, Lingxu Xiang <sup>1</sup>, Qiang Zhao <sup>1</sup>, Shuyan Cui <sup>1</sup>, Abid Ali <sup>1,2</sup>, Donghui Wu <sup>3,4</sup> and Guo Zheng <sup>1,\*</sup>

<sup>1</sup> College of Life Science, Shenyang Normal University, Shenyang 110034, China; xiaowu8181@126.com (P.W.); xianglingxums@163.com (L.X.); 15542190459@163.com (Q.Z.); cui.shu.yan@163.com (S.C.); abid\_ento74@yahoo.com (A.A.)

<sup>2</sup> Department of Entomology, University of Agriculture, Faisalabad 38040, Pakistan

<sup>3</sup> Key Laboratory of Wetland Ecology and Environment, Northeast Institute of Geography and Agroecology, Chinese Academy of Sciences, Changchun 130102, China; wudonghui@iga.ac.cn

<sup>4</sup> Key Laboratory of Vegetation Ecology, Ministry of Education, Northeast Normal University, Changchun 130024, China

\* Correspondence: zhengguo@synu.edu.cn

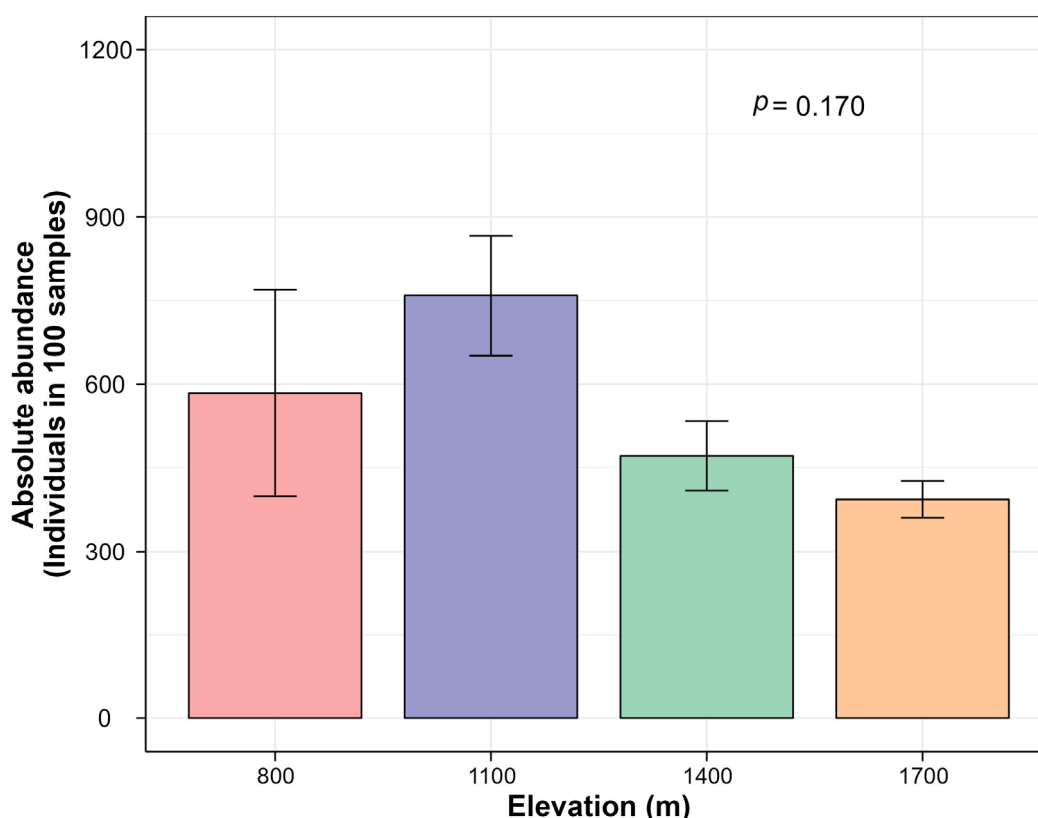

**Figure S1.** Absolute abundance of canopy spiders to elevation changes at the species level on Changbai Mountain, China. Error bar means standard error (S.E.). The number of replicates was 4 (n = 4).

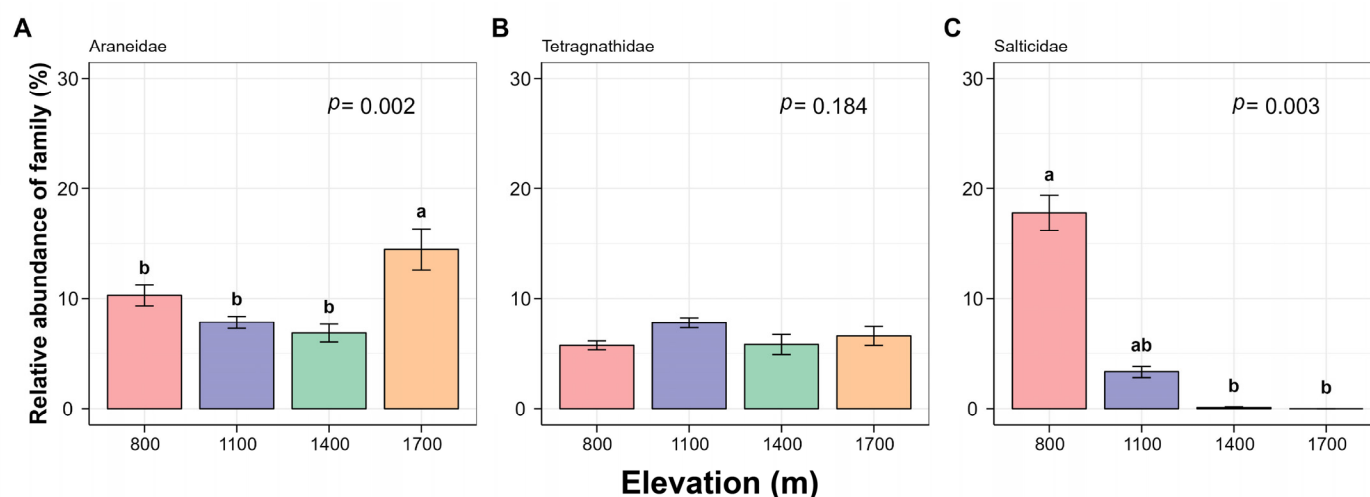

**Figure S2.** Relative abundance of Araneidae (A), Tetragnathidae (B) and Salticidae (C) to elevation changes on Changbai Mountain, China. Error bar means standard error (S.E.). The number of replicates was 4 ( $n = 4$ ). The test of Salticidae was obtained using Kruskal-Wallis test followed by DUNN test for multiple comparisons.

**Table S1.** Category of four functional guilds of spiders

| Abbreviation | Functional group   | Family <sup>1</sup>                                         |
|--------------|--------------------|-------------------------------------------------------------|
| AP           | Ambush predators   | Thomisidae, Philodromidae                                   |
| CH           | Cursorial hunters  | Clubionidae, Salticidae, Gnaphosidae, Lycosidae, Pisauridae |
| OW           | Orb weavers        | Araneidae, Tetragnathidae, Uloboridae, Theridiosomatidae    |
| SLW          | Sheet-line weavers | Linyphiidae, Theridiidae, Dictynidae, Agelenidae            |

<sup>1</sup>modified from Sørensen (2004)

**Table S2.** Individuals of canopy spiders at four elevation sites on Changbai Mountain, China

| Family      | Individuals (Proportion %) <sup>1</sup> |                    |                    |                    | Sum of species (%) <sup>2</sup> | Sum of individuals (%) <sup>3</sup> |
|-------------|-----------------------------------------|--------------------|--------------------|--------------------|---------------------------------|-------------------------------------|
|             | site 1<br>(800 m)                       | site 2<br>(1100 m) | site 3<br>(1400 m) | site 4<br>(1700 m) |                                 |                                     |
| Agelenidae  | 20                                      | 10                 | 17                 | 20                 | 3 (3.70)                        | 67 (0.76)                           |
| Araneidae   | 254 (10.87)                             | 235                | 130                | 221 (14.05)        | 14 (17.29)                      | 840 (9.52)                          |
| Clubionidae | 648 (27.74)                             | 672 (22.14)        | 417 (22.16)        | 288 (18.31)        | 3 (3.70)                        | 2025 (22.94)                        |
| Dictynidae  | 0                                       | 0                  | 1                  | 0                  | 1 (1.23)                        | 1 (0.01)                            |
| Gnaphosidae | 3                                       | 0                  | 0                  | 0                  | 2 (2.47)                        | 3 (0.03)                            |
| Linyphiidae | 286 (12.24)                             | 330 (10.87)        | 565 (30.02)        | 195(12.4)          | 25 (30.87)                      | 1376 (15.59)                        |
| Lycosidae   | 1                                       | 0                  | 0                  | 0                  | 1 (1.23)                        | 1 (0.01)                            |

|                   |             |              |             |             |            |              |
|-------------------|-------------|--------------|-------------|-------------|------------|--------------|
| Philodromidae     | 1           | 8            | 1           | 1           | 2 (2.47)   | 11 (0.12)    |
| Pisauridae        | 1           | 0            | 0           | 0           | 1 (1.23)   | 1 (0.01)     |
| Salticidae        | 382 (16.35) | 105          | 2           | 0           | 5 (6.18)   | 489 (5.54)   |
| Tetragnathidae    | 128         | 234          | 105         | 106         | 2 (2.47)   | 573 (6.49)   |
| Theridiidae       | 154         | 190          | 367 (19.5)  | 214 (13.6)  | 7 (8.64)   | 925 (10.48)  |
| Theridiosomatidae | 0           | 6            | 0           | 0           | 1 (1.23)   | 6 (0.07)     |
| Thomisidae        | 457 (19.56) | 1234 (40.66) | 277 (14.72) | 528 (33.57) | 12 (14.82) | 2496 (28.28) |
| Uloboridae        | 1           | 11           | 0           | 0           | 2 (2.47)   | 12 (0.14)    |
| SUM               | 2336        | 3035         | 1882        | 1573        | 81 (100)   | 8826 (100)   |

<sup>1</sup> means the number of canopy spiders of every family at every elevation divided by the total number of spiders at every elevation.

The proportion ( $\geq 10\%$ ) was shown in brackets.

<sup>2</sup> means the species number of canopy spiders of every family divided by the total species number.

<sup>3</sup> means the individual amounts of canopy spiders of every family divided by the total individuals.
